# Supplementary material for: TLR Signaling Is Activated in Lymph Node–Resident CLL Cells and Is Only Partially Inhibited by Ibrutinib
Source: Oxford University Press journal article supplement (doi:10.1158/0008-5472.can-18-0781), 2018-11-29
Supplement: 00085472can180781-sup-198546_4_supp_5131928_phj2j8.xlsx [file 00085472can180781-sup-198546_4_supp_5131928_phj2j8.xlsx]

## Sheet: Table S1
Paper ID	Sex	Age	Rai Stage	del17p	IGVH Mutation Status	Fig S1	Fig 1	Fig 2A	Fig 2B-F	Fig S2	Fig S3	Fig 3	Fig 4	Fig 5	Fig 6	Fig S4	Fig S5	Fig S6	Fig S7	Fig S8	Fig S9	Fig S10
CLL_M_01	F	68	3	NO	Unmutated		1	1	1	0	1	0	0	0	0		0		0	0	0	0
CLL_M_02	F	55	1	NO	Unmutated		1	0	1	1	0	0	0	0	0		0		0	0	0	1
CLL_M_03	F	61	2	NO	Unmutated		1	0	0	0	0	0	0	0	0		0		0	0	0	0
CLL_M_04	F	60	1	NO	Mutated		1	0	1	0	0	0	0	0	0		0		0	0	0	1
CLL_M_05	M	60	1	NO	Mutated		1	0	0	0	0	0	0	0	0		0		0	0	0	0
CLL_M_06	M	57	4	NO	Mutated		1	0	0	0	0	0	0	0	0		0		0	0	0	0
CLL_M_07	M	51	3	NO	Unmutated		1	0	0	0	0	0	0	0	0		0		0	0	0	0
CLL_M_08	M	58	3	NO	Unmutated		1	0	1	0	0	0	0	0	0		0		0	0	0	1
CLL_M_09	F	61	2	NO	Unmutated		1	0	0	0	0	0	0	0	0		0		0	0	0	0
CLL_M_10	F	59	1	NO	Unmutated		1	0	0	0	0	0	0	0	0		0		0	0	0	0
CLL_M_11	M	39	3	NO	Unmutated		1	0	0	0	0	0	0	0	0		0		0	0	0	0
CLL_M_12	M	30	4	NO	Unmutated		1	0	0	0	0	0	0	0	0		0		0	0	0	0
CLL_M_13	F	67	2	YES	Mutated		1	0	1	0	0	0	0	0	0		0		0	0	0	0
CLL_M_14	M	67	2	NO	Mutated		1	0	0	0	0	0	0	0	0		0		0	0	0	0
CLL_M_15	M	52	2	YES	Unmutated		1	0	0	0	0	0	0	0	0		0		0	0	0	0
CLL_M_16	M	53	4	NO	Unmutated		1	0	0	0	0	0	0	0	0		0		0	0	0	0
CLL_M_17	F	57	2	NO	Unmutated		1	0	0	0	0	0	0	0	0		0		0	0	0	0
CLL_M_18	M	48	4	NO	Unmutated		0	1	1	0	1	0	0	0	0		0		0	0	0	1
CLL_M_19	M	50	3	NO	Unmutated		0	0	1	1	0	0	0	0	0		0		0	0	0	1
CLL_M_20	M	47	4	YES	Mutated		0	0	1	0	0	0	0	0	0		0		0	0	0	0
CLL_M_21	M	48	3	YES	Unmutated		0	0	1	0	0	0	0	0	0		0		0	0	0	0
CLL_M_22	F	49	1	NO	Mutated		0	0	1	0	0	0	0	0	0		0		0	0	0	0
CLL_PB_01	M	60	4	NO	Unmutated	0	0		0	0	0	1	1	1	1	1	0	1	1	1	1
CLL_PB_02	M	69	1	NO	Unmutated	0	0		0	0	0	1	1	0	0	1	0	1	1	1	0
CLL_PB_03	F	67	1	YES	Unmutated	0	0		0	0	0	1	1	1	1	0	0	0	1	1	1
CLL_PB_04	M	64	UNK	ND	Unmutated	0	0		0	0	0	1	1	1	1	1	0	0	1	1	1
CLL_PB_05	M	65	UNK	ND	Unmutated	1	0		0	0	0	1	1	1	1	1	0	0	1	1	1
CLL_PB_06	M	53	2	YES	Unmutated	1	0		0	0	0	1	1	1	1	0	1	0	1	1	1
CLL_PB_07	M	75	4	NO	Unmutated	0	0		0	0	0	1	0	0	0	0	1	0	1	0	0
CLL_PB_08	M	58	1	NO	Unmutated	0	0		0	0	0	1	0	0	0	0	1	0	1	0	0
CLL_PB_09	F	61	0	NO	Unmutated	0	0		0	0	0	0	0	0	0	0	0	1	0	0	0	0
CLL_PB_10	M	65	1	ND	Unmutated	0	0		0	0	0	1	1	1	1	0	0	1	1	1	1
CLL_PB_11	M	43	2	YES	Unmutated	1	0		0	0	0	1	1	1	1	0	0	1	1	1	1
CLL_PB_12	M	50	3	NO	Unmutated	0	0		0	0	0	1	1	0	0	0	0	0	1	1	0
CLL_PB_13	F	67	1	NO	Unmutated	0	0		0	0	0	1	1	1	1	0	0	0	1	1	1
CLL_PB_14	F	55	1	NO	Unmutated	0	1		1	0	0	1	1	1	1	0	0	0	1	1	1
CLL_PB_15	M	71	4	NO	Unmutated	0	0		0	0	0	1	1	0	0	0	0	0	1	1	0
CLL_PB_16	M	25	1	NO	Unmutated	0	0		0	0	0	1	1	1	0	0	0	0	1	1	1
CLL_PB_17	F	61	2	NO	Unmutated	0	0		0	0	0	1	1	1	1	0	0	0	1	1	1

## Sheet: Table S2
Gene Set Name	Description	Reference	ASF1B	BRCA1	BYSL	CCNA2	CCNE2	CDC6	CENPN	DDX21	EXO1	FANCI	FEN1	GEMIN6	GINS1	GINS2	GMNN	H2AFX	HJURP	HMGA1	KIAA0101	KIF23	MAD2L1	MCM10	MCM4	MCM6	MELK	MTHFD1	NOP16	NUSAP1	OIP5	PBK	PFAS	PPIF	RAD51AP1	RRM2	SHCBP1	SLC19A1	TPX2	TRIP13	TUBG1	UBE2S	ZWINT
activation_BCR	BCR target genes_LN UP	Herishanu et al. Blood 117:563 (2011)	ACP5	ACY1	ATP2A2	BATF3	BCAR3	BTBD19	BUB1	BYSL	CCNB1	CCND2	CD44	CDC25A	CDC6	CDCA7	CHAC2	CHEK1	CHST11	CLECL1	CLK1	CXCR5	CYTIP	DDX21	EBI3	EHD4	EIF4A1	ENC1	ETNK1	EXO1	EZH2	FANCI	FEN1	GALNT6	HK2	HSF5	HSPD1	ICAM1	IL21R	IL2RB	IL4I1	IMPDH2	LYAR	MCM10	MCM4	MFSD2A	MRPL42	MTAP	MTHFD1
BAnergyUp-1	B_cell_up_anergy	Glynne et al. Nature 403:672 (2000)	CCL3	CCL3L1	CCL4	CXCL9	CXCR5	DUSP2	EGR2	GPR183	IL2RB	JUN	JUNB	KLF10	MYC	SGK1	SOCS3
BCL6-1	BCL6_repressed	Shaffer et al. Immunity 13:199 (2000)	CCL4	CD58	CD83	CTLA4	DDX21	DUSP2	EGR1	EGR3	GFI1	LPL	LY9	NFKBIE	NME1	OAS3	PAICS	PDGFA	SLAMF7
Blimp-1	Blimp_Bcell_repressed	Shaffer et al. Immunity 17:51 (2002)	BATF3	CCL3	CCL4	CCL5	CCND2	CD44	CD83	CR2	CXCL13	CXCL9	DUSP2	EBI3	GADD45B	GPR183	HEATR1	ICAM1	IL4I1	JUNB	MAP3K8	MYC	NAMPT	NFKBIE	PLK3	PTGER4	RFTN1	RGS1	SEMA7A	SGK1	SOCS3	TMSB4X	TNF
CD40Dn-1	CD40_downregulated_Burkitt_lymphoma	Basso et al. Blood 104:4088 (2004)	AURKA	CD44	CHEK1	CXCL13	DHRS9	DUSP1	EIF5	GPR183	IL21R	IL2RB	JUN	JUNB	KLHL6	LDHA	MTHFD2	NAMPT	PRR11	SGK1	SOCS3	ST8SIA4	TUBG1	ZMIZ1
CD40Up-1	CD40_upregulated_Burkitt_lymphoma	Basso et al. Blood 104:4088 (2004)	CCL3	CCL4	CD44	CD58	CD83	CR2	CXCR5	DUSP2	GADD45B	GPR183	HLA-F	ICAM1	JUNB	MAP3K8	NFKBIE	PHACTR1	RGS1	SRGN	TMSB4X	TNF
E2F3Up-1	E2F3_overexpression_2x_up	Bild et al. Nature 439:353 (2006)	CCL4	CD40LG	CD83	FOS	FOSB	HSPA1A	IL21R	JUN	MAP3K8	MYC	NR4A2	RGS2	SOCS3	TNF	XCL1
HIF1aDn-1	HIF1alpha_1.5x_down	Manalo et al. Blood 105:659 (2005)	ASPM	CDC20	CDK1	CDKN3	CENPF	PCNA	TK1	TOP2A	UHRF1
HIF1aUp-1	HIF1alpha_1.5x_Up	Manalo et al. Blood 105:659 (2005)	BATF3	BCAR3	CR2	CXCL13	CXCL9	CXCR5	DHRS9	DUSP1	GPR183	IL21R	IL2RB	JUN	JUNB	KLHL6	RAD51	SGK1	SOCS3	ST8SIA4	TLR10
HRASDn-1	HRAS_overexpression_2x_down	Bild et al. Nature 439:353 (2006)	ACTG1	CCL3	CCL4	CCND2	GBP1	GPR183	ICAM1	SGK1	TNF
HRASUp-1	HRAS_overexpression_2x_up	Bild et al. Nature 439:353 (2006)	ABCG1	BATF3	CD1C	CD40LG	CHI3L2	CHST11	CTNNAL1	EGR1	FAM46C	GLRX2	JUN	SPRED2	TAF1D
IFN-1	IFN_PMBC_2x_Up	Baechler et al. PNAS 100:2610 (2003)	CCND2	CD83	EGR1	EGR2	GFI1	LCK
Ig-1	Immunoglobulin_Node2868	Su et al. PNAS 101:6062 (2004)	AKAP12	B4GALT1	CHST11	DUSP1	DUSP4	DUSP6	EGR1	FOS	HK2	JUNB	KLF6	MFSD2A	NAMPT	PPIF	PPP1R15A	SLC2A14	SLC2A3
IL10Up-1	IL10_OCILy3_Up	Lam et al. Blood. 111:3701 (2008)	ATP2A2	BYSL	CDC25A	CDT1	CENPF	CTSC	DDX21	FABP5	GM2A	H2AFX	HIST1H2BI	HIST2H2AA3	HLA-F	HMMR	HSPE1	LDHB	MORF4L2	MYC	NME1	NOP16	PPIF	PRDX3	SLC39A14	TK1	TOP2A	TRIP13	TUBG1	UCK2
IL-4_reg	IL-4 target genes_CLL	Ruiz-Lafuente et al. PLOSone 9 (2014)	CCL3	CCND2	CD44	CD69	GPR183
IL6Up-4	IL6_OCILy10_Up_all	Lam et al. Blood. 111:3701 (2008)	SKIL	SMAD7	GADD45B	JUN	JUNB	SGK1	WNT5B
IRF3-1	IRF3_target_gene	Ogawa et al. Cell 122:707 (2005)	COL1A1	DFNA5	GADD45B	JUN	JUNB	MAP3K8	PALLD	SERPINE2	SGK1
IRF4Up-3	IRF4_myeloma_induced_all	Shaffer et al. Nature. 454:226 (2008)	APOBEC3B	AURKA	CCL3	CDT1	CENPF	DEPDC1	GLS	HK2	HMMR	LDHA	MKI67	MTHFD1L	MYC	NAMPT	NR4A1	PAICS	SLAMF7	UCK2	VDAC1
JAKUp-1	JAK_IL10_Ly10_Up	Lam et al. Blood. 111:3701 (2008)	CXCL9	DHRS9	GPR183	IL2RB	JUN	JUNB	KLHL6
KLF2Dn-2	KLF2_repressed	Haaland et al. Mol. Immunol. 42:627 (2005)	DENND2D	EGR1	FABP5	HK2	IMPDH2	LDHA	MYC	NOP16	PPAN	RRM1	TK1
KLF2Up-1	KLF2_induced	Haaland et al. Mol. Immunol. 42:627 (2005)	CENPN	CHEK1	CKLF	LYAR	MAP3K8	MTHFD1	NME1	NOP16	SLC16A1	SMC2	TPM2	TUBG1	UCK2	VDAC1
KRASDn-1	KRAS_Down	Sweet-Cordero et al. Nat Genet 37:48 (2005)	CCNE2	CD83	DTL	FEN1	GINS1	PCNA	RECQL4	RRAGD	SCN8A	TIAM1	UGT8
KRASUp-1	KRAS_Up	Sweet-Cordero et al. Nat Genet 37:48 (2005)	AKAP12	AXL	BICD1	CCL5	CDC25A	CST7	CXCL9	ETNK1	FAM46C	HSPA1B	MELK	UBD
MCL_proliferation	Proliferation_MCL	Rosenwald et al. Cancer Cell. 3:185 (2003)	BYSL	DUSP4	EIF5	ETV5	RGS2	RRM2	SPRED2
MYCDn-1	Myc_overexpression_2x_down	Bild et al. Nature 439:353 (2006)	DUSP2	HK2	HSPA1A	HSPD1	MYC	NOP16	PAICS	SLC19A1
MYCUp-2	Myc_overexpression_1.5x_up	Bild et al. Nature 439:353 (2006)	CPM	CYBRD1	DAB2	GLS	LPIN1	MAF	NME1	PPAN	PPIF	REV3L	RNF213	SLC40A1
NFkB-1-3-10	NFkB_Up_all_OCILy3_Ly10_K1106_HBL1	Lam et al. Clinical Cancer Research 11:1 (2005) & Staudt Lab unpublished data	CCR5	CKLF	RGS1
NotchDN1-2-3	Notch_T-ALL_down_Weng_Sharma_Palomero	Weng et al. Genes Dev 20:2096 (2006) Sharma et al. Mol Cell Biol 26:8022 (2006) Palomerao et al. PNAS, 103:18261 (2006)	AICDA	CR2	CXCR5	PAG1	TLR10
NotchUP1-2-4	Notch_T-ALL_up_Weng_Sharma_Palomero	Weng et al. Genes Dev 20:2096 (2006) Sharma et al. Mol Cell Biol 26:8022 (2006) Palomerao et al. PNAS, 103:18261 (2006)	DUSP2	DUSP6	GM2A	ZWINT
p53up-1	p53_up_Xray	Rosenwald et al. Blood. 104:1428 (2004)	ENC1	PCNA
PAX5-1	PAX5_repressed	Delogu et al. Immunity 24:269 (2006)	LDHA	RGS2
PGC1up-1	PGC-1alpha_overepxression_up	Mootha et al. Nature Genetics 34:267 (2003)	APOBEC3B	CD69	CXCL9	GBP1	RGS1	SYNE2	UBD
Quiesce-1	Quiescence_heme_all	Su et al. PNAS 101:6062 (2004)	MYC	PTGER4
SerumDown	Serum_response_Fb_down	Chang et al. PLOS Biol 2:206 (2004)	AIF1	BIK	DFNA5	RERE
SerumUp	Serum_response_Fb_up	Chang et al. PLOS Biol 2:206 (2004)	DUSP2	EGR3
SREBPUp-1	SREBP1a&2_up_Scap_dep	Horton et al. PNAS 100:12027 (2003)	CD44	EIF5	HEATR1	HLA-F	HNRNPAB	JUN	KLF6	NR4A2	PCBP2	RBM8A
StarveDn-4	Glutamine_Glucose_starve_both_down	Peng et al. MCB 22:5575 (2002)	CCL3L1	CST7	LCK
StarveUp-4	Glutamine_Glucose_starve_both_up	Peng et al. MCB 22:5575 (2002)	DUSP6	FILIP1L	GADD45B	GLS	SLC2A14	SLC2A3
STAT3Up-1-2	STAT3_up_OCILy10_high_ABCDLBCL_subgroup	Lam et al. Blood. 111:3701 (2008)	HLA-F	RBM8A	TIAM1
TActDn-5	Tcell_PIrep_CsAup4x	Feske et al. Nat Immunol 2:316 (2001)	CDKN3	SLC1A4
TActUp-5	Tcell_PIind_CsAdown4x	Feske et al. Nat Immunol 2:316 (2001)	ZC3HAV1L
TAnergy-1	T_cell_up_ionomycin_anergy	Macian et al. Cell 109:719 (2002)
TcytDn-1	Tcell_cytokine_repressed	Kovanen et al. J Biol Chem 278:5205 (2003)	PDGFA
TcytUp-6	Tcell_cytokine_induced_PMBC_Bcell_induced	Kovanen et al. J Biol Chem 278:5205 (2003)
TGFBDn-1-2	TGFbeta_down_epithelial_small_large	Kang et al. Mol Cell 11:915-26 (2003)
TGFBUp-5-6	TGFbeta_up_epithelial_small_large	Kang et al. Mol Cell 11:915-26 (2003)
TLR-1	DC_TLR4_TLR8_synergy	Napolitani et al. Nat Immunol 6:769 (2005)
TLR-CpG	TLR_Target_genes_CpG_stim	Bomben et al. Leukemia 26:1584 (2012)
XBP-1	XBP1_target_all	Shaffer et al. Immunity 2004 21:81-93 (2004)
[truncated: 30 more columns]

## Sheet: Table S3
Probe Set ID	Gene Symbol	mean Δ LN/PB1	p-value Δ LN/PB	FDR q-value Δ LN/PB	Direction of change
216834_at	RGS1	5.16905	2.90539e-09	3.64017e-06	UP
209189_at	FOS	4.66895	2.17044e-10	9.49343e-07	UP
202768_at	FOSB	4.01024	1.15196e-09	2.1608e-06	UP
202589_at	TYMS	3.31476	2.34582e-10	9.49343e-07	UP
201890_at	RRM2	3.24811	1.25383e-10	8.12811e-07	UP
202503_s_at	KIAA0101	2.96688	4.9697e-09	5.01952e-06	UP
202388_at	RGS2	2.74807	3.70988e-06	0.000242548	UP
203213_at	CDK1	2.65109	9.47321e-08	2.53255e-05	UP
204621_s_at	NR4A2	2.58816	1.5408e-07	3.37187e-05	UP
201041_s_at	DUSP1	2.52346	7.70115e-07	8.66731e-05	UP
204103_at	CCL4	2.52231	2.08351e-07	3.88318e-05	UP
204825_at	MELK	2.38159	7.54205e-09	5.7019e-06	UP
201694_s_at	EGR1	2.34017	1.74928e-06	0.000145371	UP
219918_s_at	ASPM	2.28116	1.35242e-09	2.42151e-06	UP
201291_s_at	TOP2A	2.24972	7.34818e-09	5.7019e-06	UP
205114_s_at	CCL3	2.21486	3.96723e-07	5.52202e-05	UP
205114_s_at	CCL3L1	2.21486	3.96723e-07	5.52202e-05	UP
202870_s_at	CDC20	2.20942	2.74219e-08	1.1741e-05	UP
221841_s_at	KLF4	2.16787	0.000178943	0.00337199	UP
1559126_at	RRP12	2.01668	8.7924e-06	0.000436748	UP
210052_s_at	TPX2	1.9942	5.77409e-08	1.87973e-05	UP
202705_at	CCNB2	1.94829	3.43829e-08	1.33198e-05	UP
205249_at	EGR2	1.92623	2.13463e-07	3.90088e-05	UP
205544_s_at	CR2	1.87631	3.32324e-10	1.19005e-06	UP
203764_at	DLGAP5	1.86808	3.14471e-07	4.7769e-05	UP
204126_s_at	CDC45	1.86153	1.07594e-08	6.94793e-06	UP
220651_s_at	MCM10	1.83477	2.10678e-06	0.000164659	UP
218755_at	KIF20A	1.83293	8.29648e-08	2.25384e-05	UP
225655_at	UHRF1	1.79654	3.02363e-07	4.70766e-05	UP
201427_s_at	SEPP1	1.79564	1.32861e-07	3.07855e-05	UP
223700_at	MND1	1.77589	1.09391e-06	0.00010719	UP
219148_at	PBK	1.77042	2.58846e-06	0.000189873	UP
1555758_a_at	CDKN3	1.76497	4.89271e-07	6.33843e-05	UP
207165_at	HMMR	1.74505	1.80152e-08	8.98274e-06	UP
207828_s_at	CENPF	1.72341	1.80106e-08	8.98274e-06	UP
218542_at	CEP55	1.70188	5.40514e-08	1.84584e-05	UP
204026_s_at	ZWINT	1.70118	1.40549e-07	3.20021e-05	UP
204170_s_at	CKS2	1.69435	5.07885e-08	1.78626e-05	UP
209795_at	CD69	1.69033	7.57176e-08	2.19308e-05	UP
228273_at	PRR11	1.68587	5.49371e-09	5.03262e-06	UP
202581_at	HSPA1B	1.68213	0.00213612	0.0206434	UP
204440_at	CD83	1.67655	1.93089e-09	2.86324e-06	UP
204641_at	NEK2	1.63551	3.58947e-06	0.000237236	UP
243797_at	STK17B	1.63457	2.59387e-07	4.37045e-05	UP
209642_at	BUB1	1.619	4.03845e-07	5.58171e-05	UP
231124_x_at	LY9	1.61719	9.91848e-07	0.00010201	UP
202393_s_at	KLF10	1.61256	6.03878e-06	0.000340844	UP
201465_s_at	JUN	1.59308	0.000166949	0.00325442	UP
202014_at	PPP1R15A	1.58082	2.84605e-06	0.000201272	UP
204794_at	DUSP2	1.55587	1.35368e-06	0.000123432	UP
202580_x_at	FOXM1	1.53841	1.65361e-06	0.000139967	UP
218726_at	HJURP	1.52819	7.44709e-06	0.000394583	UP
204962_s_at	CENPA	1.52509	1.24473e-08	7.42896e-06	UP
243296_at	NAMPT	1.51143	2.05657e-07	3.88318e-05	UP
202345_s_at	FABP5	1.49835	5.3217e-07	6.75582e-05	UP
239827_at	RGCC	1.49523	1.4121e-05	0.00060663	UP
205987_at	CD1C	1.48863	5.48985e-06	0.000318954	UP
202954_at	UBE2C	1.48247	1.89774e-06	0.000151796	UP
213638_at	PHACTR1	1.48221	2.11737e-11	2.78018e-07	UP
224499_s_at	AICDA	1.47027	0.000186445	0.0034159	UP
218662_s_at	NCAPG	1.46674	3.74557e-07	5.32733e-05	UP
218039_at	NUSAP1	1.46254	1.45521e-08	8.14179e-06	UP
222608_s_at	ANLN	1.42055	0.000131445	0.00292859	UP
224428_s_at	CDCA7	1.40771	1.26024e-07	2.97812e-05	UP
222680_s_at	DTL	1.39074	7.67763e-08	2.20752e-05	UP
209464_at	AURKB	1.3885	1.1486e-06	0.000110278	UP
201473_at	JUNB	1.36674	5.75434e-05	0.00162138	UP
225834_at	FAM72A	1.36305	6.58363e-07	7.69542e-05	UP
221436_s_at	CDCA3	1.35845	2.38571e-07	4.15821e-05	UP
207574_s_at	GADD45B	1.348	5.87659e-06	0.000335972	UP
201577_at	NME1	1.3234	1.63673e-06	0.000139967	UP
230966_at	IL4I1	1.31304	0.000227405	0.00389402	UP
226034_at	DUSP4	1.31304	3.95724e-05	0.00124504	UP
226264_at	SUSD1	1.30805	9.68283e-09	6.57614e-06	UP
206364_at	KIF14	1.30156	1.79835e-06	0.000147581	UP
204649_at	TROAP	1.29769	2.69849e-06	0.000194682	UP
235343_at	VASH2	1.27315	3.33447e-08	1.33198e-05	UP
233138_at	LDLRAD4	1.27239	0.000405174	0.00609054	UP
221520_s_at	CDCA8	1.27041	0.000121461	0.00274812	UP
204897_at	PTGER4	1.27021	5.29425e-07	6.74906e-05	UP
209891_at	SPC25	1.26357	6.1823e-05	0.00170776	UP
200953_s_at	CCND2	1.2598	5.21728e-10	1.30556e-06	UP
211610_at	KLF6	1.25888	0.000569306	0.00776114	UP
212949_at	NCAPH	1.24082	6.66346e-06	0.000366593	UP
214710_s_at	CCNB1	1.23507	1.1875e-05	0.000537037	UP
204567_s_at	ABCG1	1.23271	5.03311e-08	1.78612e-05	UP
218355_at	KIF4A	1.22995	2.94842e-07	4.66631e-05	UP
226661_at	CDCA2	1.22725	1.69388e-05	0.000686289	UP
206632_s_at	APOBEC3B	1.22474	7.76381e-06	0.000403462	UP
1554408_a_at	TK1	1.21767	6.40065e-07	7.56245e-05	UP
204995_at	CDK5R1	1.21669	1.12655e-05	0.000516146	UP
204822_at	TTK	1.21483	1.0188e-06	0.000103004	UP
219493_at	SHCBP1	1.21109	8.06901e-06	0.000413862	UP
204092_s_at	AURKA	1.19947	2.04204e-06	0.000160555	UP
203362_s_at	MAD2L1	1.19541	2.19533e-06	0.000167977	UP
215942_s_at	GTSE1	1.18822	1.64771e-06	0.000139967	UP
226818_at	MPEG1	1.18714	6.25061e-06	0.000350465	UP
222039_at	KIF18B	1.1863	9.02198e-06	0.000444787	UP
219990_at	E2F8	1.18593	0.000235001	0.00406415	UP
222958_s_at	DEPDC1	1.18328	1.76506e-05	0.000710166	UP
222763_s_at	WDR33	1.18025	5.43571e-08	1.84584e-05	UP
204032_at	BCAR3	1.17668	2.0741e-11	2.78018e-07	UP
227915_at	ASB2	1.17472	1.20429e-06	0.000112845	UP
202499_s_at	SLC2A3	1.17251	1.15582e-05	0.000524372	UP
228868_x_at	CDT1	1.16484	1.7774e-06	0.000147397	UP
200800_s_at	HSPA1A	1.16059	0.0132783	0.0766018	UP
236341_at	CTLA4	1.15939	1.821e-05	0.000723095	UP
208893_s_at	DUSP6	1.1436	4.28527e-07	5.70274e-05	UP
227697_at	SOCS3	1.14266	0.00132983	0.0145438	UP
226372_at	CHST11	1.137	4.76176e-08	1.713e-05	UP
212020_s_at	MKI67	1.13294	1.54552e-08	8.33732e-06	UP
201761_at	MTHFD2	1.13215	1.81823e-06	0.000148593	UP
204603_at	EXO1	1.12991	0.000114422	0.00263117	UP
205046_at	CENPE	1.12817	2.52378e-06	0.000186518	UP
223044_at	SLC40A1	1.12206	0.000229258	0.0039215	UP
201930_at	MCM6	1.11327	1.44877e-07	3.24253e-05	UP
200664_s_at	DNAJB1	1.10788	0.000185367	0.00339003	UP
224789_at	DCAF12	1.10699	1.91638e-07	3.77048e-05	UP
206666_at	GZMK	1.10542	0.000750333	0.00961124	UP
223381_at	NUF2	1.09658	1.86219e-06	0.000150623	UP
203554_x_at	PTTG1	1.09424	4.69134e-06	0.00028343	UP
203968_s_at	CDC6	1.08582	6.83952e-07	7.92399e-05	UP
1557049_at	BTBD19	1.07373	1.57884e-05	0.000651958	UP
226936_at	CENPW	1.06718	4.08642e-06	0.000259891	UP
214290_s_at	HIST2H2AA3	1.06112	1.21045e-05	0.000544924	UP
202431_s_at	MYC	1.06016	0.000540677	0.00762455	UP
1555827_at	CCNL1	1.05581	0.000595411	0.00809033	UP
208078_s_at	SIK1	1.05374	0.000172171	0.00331338	UP
223553_s_at	DOK3	1.05096	1.49446e-07	3.28873e-05	UP
205890_s_at	UBD	1.04743	0.000269331	0.00448206	UP
204774_at	EVI2A	1.04572	1.00632e-06	0.000102165	UP
206115_at	EGR3	1.04159	0.000220157	0.00383186	UP
202094_at	BIRC5	1.03532	1.45862e-07	3.24352e-05	UP
213007_at	FANCI	1.03274	2.77412e-07	4.51551e-05	UP
212141_at	MCM4	1.03121	8.13512e-05	0.00207375	UP
221081_s_at	DENND2D	1.03095	5.25221e-09	5.03262e-06	UP
204529_s_at	TOX	1.02938	2.36719e-06	0.000177611	UP
224753_at	CDCA5	1.02484	7.95423e-07	8.77661e-05	UP
204709_s_at	KIF23	1.02103	0.00047664	0.00690239	UP
201013_s_at	PAICS	1.02075	1.49742e-05	0.000632207	UP
225353_s_at	C1QC	1.01475	1.77655e-05	0.000711903	UP
201739_at	SGK1	1.00759	6.52236e-05	0.00176579	UP
221521_s_at	GINS2	1.00559	3.64554e-05	0.00116939	UP
216236_s_at	SLC2A14	1.00294	0.000116592	0.00266968	UP
205394_at	CHEK1	1.00233	7.90258e-06	0.000408503	UP
218232_at	C1QA	0.996169	8.0768e-05	0.00206591	UP
38158_at	ESPL1	0.992748	7.11043e-07	8.11846e-05	UP
223361_at	ABRACL	0.984667	5.71719e-08	1.87973e-05	UP
209408_at	KIF2C	0.980656	1.15679e-05	0.000524372	UP
206589_at	GFI1	0.978408	1.03566e-05	0.000485897	UP
223158_s_at	NEK6	0.977448	5.75508e-09	5.03774e-06	UP
223229_at	UBE2T	0.972103	2.42284e-05	0.000885326	UP
1554999_at	RASGEF1B	0.96454	0.000199506	0.00358794	UP
233085_s_at	NABP1	0.963123	6.09106e-07	7.31534e-05	UP
210108_at	CACNA1D	0.962116	0.000291992	0.00472379	UP
206914_at	CRTAM	0.961094	0.0015079	0.016177	UP
232461_at	AHI1	0.957015	0.000209241	0.00371592	UP
213135_at	TIAM1	0.951939	1.55352e-05	0.000644834	UP
224802_at	NDFIP2	0.951751	2.57953e-09	3.38701e-06	UP
228030_at	RBM6	0.946485	5.15937e-06	0.000305154	UP
224990_at	SMIM14	0.940737	4.42129e-10	1.30556e-06	UP
1556499_s_at	COL1A1	0.94062	0.000382907	0.00597466	UP
205242_at	CXCL13	0.937999	0.000341607	0.00542126	UP
219000_s_at	DSCC1	0.936702	5.3715e-05	0.00154107	UP
203349_s_at	ETV5	0.935264	1.80794e-06	0.000148059	UP
218280_x_at	HIST2H2AA4	0.931856	2.78543e-05	0.00097249	UP
213539_at	CD3D	0.930128	0.000163025	0.00317979	UP
202468_s_at	CTNNAL1	0.92809	1.35927e-05	0.000592946	UP
212124_at	ZMIZ1	0.927971	9.9225e-08	2.58846e-05	UP
204444_at	KIF11	0.925483	1.90081e-06	0.000151796	UP
217649_at	ZFAND5	0.924607	1.68535e-05	0.000684409	UP
202686_s_at	AXL	0.923499	0.000157327	0.00306866	UP
205167_s_at	CDC25C	0.923288	0.00023615	0.00406415	UP
214735_at	IPCEF1	0.922143	4.28252e-07	5.70274e-05	UP
219510_at	POLQ	0.920888	9.49952e-07	9.82141e-05	UP
203549_s_at	LPL	0.917431	0.000370297	0.00570749	UP
218113_at	TMEM2	0.91242	2.97338e-07	4.66631e-05	UP
209610_s_at	SLC1A4	0.911994	2.29354e-07	4.10566e-05	UP
204033_at	TRIP13	0.910122	9.89327e-06	0.000471228	UP
208575_at	HIST1H3A	0.904829	0.000446586	0.00641436	UP
207907_at	TNFSF14	0.903077	4.97306e-06	0.00029636	UP
219971_at	IL21R	0.902775	3.80322e-09	4.04899e-06	UP
227165_at	SKA3	0.902338	9.28388e-06	0.000452601	UP
205436_s_at	H2AFX	0.899723	4.01123e-06	0.000256921	UP
226980_at	DEPDC1B	0.896886	1.80518e-05	0.000720107	UP
204852_s_at	PTPN7	0.896571	4.09815e-09	4.24816e-06	UP
210933_s_at	FSCN1	0.896224	2.51114e-05	0.000903244	UP
221900_at	COL8A2	0.891086	0.00455993	0.0359109	UP
209757_s_at	MYCN	0.889292	0.00106336	0.0124592	UP
202779_s_at	UBE2S	0.884171	1.51382e-05	0.000635724	UP
1555878_at	RPS24	0.882972	1.55766e-06	0.000135747	UP
1561489_at	ARHGAP15	0.881708	0.000149371	0.0029571	UP
227844_at	FMNL3	0.880228	6.07739e-08	1.91516e-05	UP
203868_s_at	VCAM1	0.875621	0.000474112	0.00682533	UP
230345_at	SEMA7A	0.875514	8.50384e-06	0.000426719	UP
206102_at	GINS1	0.874535	6.41086e-05	0.00174761	UP
203612_at	BYSL	0.873338	0.00112169	0.01291	UP
219105_x_at	ORC6	0.870673	8.09462e-07	8.85759e-05	UP
241843_at	EIF5	0.867489	0.000682005	0.00908238	UP
201202_at	PCNA	0.867168	1.87934e-06	0.00015108	UP
213925_at	C1orf95	0.866566	0.000953635	0.0115198	UP
204891_s_at	LCK	0.863942	4.49965e-08	1.64116e-05	UP
1555759_a_at	CCL5	0.856794	0.000782309	0.00997063	UP
207892_at	CD40LG	0.855806	7.92718e-06	0.000408503	UP
229610_at	CKAP2L	0.852771	2.34248e-05	0.000863168	UP
213060_s_at	CHI3L2	0.852205	6.11977e-05	0.00169168	UP
203145_at	SPAG5	0.84733	4.15202e-06	0.000260019	UP
208496_x_at	HIST1H3G	0.846426	0.00460894	0.0361629	UP
218883_s_at	CENPU	0.844763	1.83345e-05	0.000725969	UP
200807_s_at	HSPD1	0.843369	1.79606e-07	3.66573e-05	UP
212187_x_at	PTGDS	0.841473	0.000797569	0.0100247	UP
214516_at	HIST1H4B	0.841301	4.97232e-05	0.00146825	UP
203695_s_at	DFNA5	0.838809	1.65862e-05	0.000675643	UP
202613_at	CTPS1	0.836357	4.00385e-07	5.55337e-05	UP
201277_s_at	HNRNPAB	0.835765	9.20928e-07	9.67367e-05	UP
205419_at	GPR183	0.832975	0.00381129	0.0313158	UP
219161_s_at	CKLF	0.832857	4.081e-07	5.60462e-05	UP
213599_at	OIP5	0.831108	8.27778e-06	0.000420735	UP
228776_at	GJC1	0.830614	0.00290278	0.0257202	UP
222895_s_at	BCL11B	0.830012	0.00202742	0.0199235	UP
211714_x_at	TUBB	0.82772	1.54845e-05	0.000643407	UP
200897_s_at	PALLD	0.824645	0.000502086	0.00719802	UP
218656_s_at	LHFP	0.82367	2.89079e-05	0.000999746	UP
216438_s_at	TMSB4X	0.822501	1.61378e-06	0.000139711	UP
225520_at	MTHFD1L	0.817585	4.72897e-07	6.18867e-05	UP
213226_at	CCNA2	0.815746	1.39377e-05	0.000604026	UP
223556_at	HELLS	0.811704	3.22626e-05	0.00108066	UP
218350_s_at	GMNN	0.811551	0.000192955	0.00350091	UP
228231_at	SNX8	0.809989	1.96594e-08	9.41502e-06	UP
212190_at	SERPINE2	0.805926	0.000285068	0.00463868	UP
238736_at	REV3L	0.80505	0.000329277	0.00514912	UP
204083_s_at	TPM2	0.80421	0.0045227	0.0357534	UP
208864_s_at	TXN	0.801866	2.99628e-05	0.00102099	UP
209606_at	CYTIP	0.795263	8.0012e-07	8.80378e-05	UP
223751_x_at	TLR10	0.794476	1.7907e-06	0.00014744	UP
230836_at	ST8SIA4	0.793461	3.20609e-07	4.79433e-05	UP
211795_s_at	FYB	0.793418	0.000300434	0.00482009	UP
220485_s_at	SIRPG	0.793195	0.000478932	0.00695652	UP
235572_at	SPC24	0.789585	0.00137259	0.0147936	UP
205554_s_at	DNASE1L3	0.788774	2.31662e-05	0.000856041	UP
201785_at	RNASE1	0.7883	0.000206246	0.0036595	UP
240070_at	TIGIT	0.786987	7.12915e-06	0.00038364	UP
204767_s_at	FEN1	0.786322	4.73841e-05	0.00142264	UP
203645_s_at	CD163	0.784671	0.00249934	0.023341	UP
235117_at	CHAC2	0.784533	0.000367795	0.0056788	UP
219539_at	GEMIN6	0.784328	0.000108389	0.00253386	UP
205133_s_at	HSPE1	0.784149	1.34871e-05	0.000590957	UP
203358_s_at	EZH2	0.779072	7.2176e-08	2.14982e-05	UP
210313_at	LILRA4	0.778956	0.000923089	0.011247	UP
219654_at	HACD1	0.77452	3.88397e-06	0.000250398	UP
210191_s_at	PHTF1	0.77394	2.62191e-07	4.39488e-05	UP
204558_at	RAD54L	0.773707	0.00046163	0.00662409	UP
218115_at	ASF1B	0.772714	0.00028137	0.00461119	UP
203387_s_at	TBC1D4	0.76921	0.00277817	0.0251629	UP
218984_at	PUS7	0.769181	2.96459e-05	0.00101458	UP
201489_at	PPIF	0.768782	3.4219e-05	0.00112702	UP
210162_s_at	NFATC1	0.767599	1.34796e-07	3.10512e-05	UP
217848_s_at	PPA1	0.763522	0.000133543	0.00193896	UP
222077_s_at	RACGAP1	0.762189	1.85137e-06	0.000150056	UP
204135_at	FILIP1L	0.761911	2.55389e-05	0.0009124	UP
237033_at	FAM159A	0.760937	8.26086e-08	2.25384e-05	UP
201695_s_at	PNP	0.76091	1.38054e-08	7.88128e-06	UP
227607_at	STAMBPL1	0.759612	6.8724e-08	2.08239e-05	UP
201030_x_at	LDHB	0.759309	1.64518e-07	3.50125e-05	UP
202934_at	HK2	0.758401	2.64777e-06	0.000192078	UP
206100_at	CPM	0.755354	0.0115032	0.0693139	UP
243857_at	MORF4L2	0.753162	1.04139e-05	0.000487648	UP
244434_at	GPR82	0.752208	0.00646876	0.0464346	UP
209348_s_at	MAF	0.751569	0.0030789	0.0271855	UP
225723_at	CCDC167	0.750958	6.859e-05	0.00182433	UP
210517_s_at	AKAP12	0.750893	3.76918e-05	0.00119929	UP
230718_at	HSF5	0.750862	1.85424e-08	9.08021e-06	UP
205291_at	IL2RB	0.750383	1.79129e-06	0.00014744	UP
226481_at	VPRBP	0.750165	1.51077e-05	0.00063512	UP
228303_at	GALNT6	0.748916	0.000163344	0.00318532	UP
213453_x_at	GAPDH	0.748712	1.63803e-08	8.50073e-06	UP
1552280_at	TIMD4	0.748662	0.000559552	0.00770914	UP
219555_s_at	CENPN	0.747024	6.24307e-05	0.00172093	UP
222067_x_at	HIST1H2BD	0.746241	0.000593156	0.00804906	UP
238987_at	B4GALT1	0.745875	0.00331488	0.0286035	UP
227481_at	CNKSR3	0.744674	0.0076947	0.0523844	UP
201892_s_at	IMPDH2	0.743723	7.88106e-05	0.00202771	UP
204146_at	RAD51AP1	0.741163	2.38287e-05	0.000876852	UP
218051_s_at	NT5DC2	0.740182	0.000638824	0.00844226	UP
219787_s_at	ECT2	0.736395	3.55618e-06	0.000235827	UP
219424_at	EBI3	0.735214	0.000739305	0.00953818	UP
228280_at	ZC3HAV1L	0.73347	0.000145046	0.00210474	UP
206210_s_at	CETP	0.733415	0.000364977	0.00566191	UP
203755_at	BUB1B	0.7324	6.29731e-05	0.00172983	UP
213566_at	RNASE6	0.72991	4.0769e-05	0.00127152	UP
202240_at	PLK1	0.729862	0.00175612	0.0180823	UP
214683_s_at	CLK1	0.729481	1.76861e-05	0.000710166	UP
214132_at	ATP5C1	0.723462	9.71058e-06	0.000464775	UP
236554_x_at	TMC8	0.723367	1.33706e-08	7.86092e-06	UP
217591_at	SKIL	0.722825	0.00121293	0.0137175	UP
209398_at	HIST1H1C	0.721369	0.000156136	0.00306866	UP
204240_s_at	SMC2	0.720587	2.2755e-05	0.00084681	UP
225557_at	CSRNP1	0.720451	0.0050022	0.038233	UP
204958_at	PLK3	0.719546	2.95176e-07	4.66631e-05	UP
212458_at	SPRED2	0.71933	8.66979e-06	0.00043241	UP
218272_at	TTC38	0.718676	0.00229386	0.0218808	UP
228956_at	UGT8	0.717993	2.38407e-05	0.000876852	UP
221524_s_at	RRAGD	0.717151	0.00269963	0.0247367	UP
201939_at	PLK2	0.715688	0.000337203	0.00535894	UP
222838_at	SLAMF7	0.715684	0.00180218	0.0182862	UP
201858_s_at	SRGN	0.714436	7.80175e-07	8.72617e-05	UP
1564970_at	SETDB2	0.711395	6.56075e-05	0.0017701	UP
203381_s_at	APOE	0.711323	0.000101825	0.00241626	UP
212646_at	RFTN1	0.711177	2.078e-06	0.000162733	UP
1558972_s_at	THEMIS	0.710598	0.0014073	0.015158	UP
201477_s_at	RRM1	0.710498	3.9992e-05	0.00125424	UP
223172_s_at	MTFP1	0.710047	7.653e-06	0.000399813	UP
209186_at	ATP2A2	0.709358	1.48818e-08	8.14179e-06	UP
209777_s_at	SLC19A1	0.709316	0.00101411	0.0119156	UP
205024_s_at	RAD51	0.706229	0.000121886	0.00275409	UP
1562368_at	CARD11	0.704758	6.89748e-05	0.00182962	UP
220306_at	FAM46C	0.704645	0.0063788	0.0460404	UP
212737_at	GM2A	0.704572	3.76049e-09	4.04899e-06	UP
210621_s_at	RASA1	0.70442	2.37221e-08	1.09934e-05	UP
224850_at	ATAD1	0.704374	2.9013e-07	4.66631e-05	UP
218566_s_at	CHORDC1	0.702206	4.15163e-06	0.000260019	UP
228071_at	GIMAP7	0.701013	0.00432846	0.0342708	UP
225060_at	LRP11	0.700889	0.00356392	0.0301295	UP
226147_s_at	PIGR	0.700761	0.000140818	0.00206591	UP
231504_at	CCDC148	0.700331	0.000744584	0.00958799	UP
207113_s_at	TNF	0.699048	3.50103e-05	0.00114447	UP
200838_at	CTSB	0.694756	6.81364e-08	2.08059e-05	UP
205463_s_at	PDGFA	0.694504	0.00417606	0.0335623	UP
218400_at	OAS3	0.693308	0.000148483	0.00217416	UP
205691_at	SYNGR3	0.692278	5.31093e-05	0.00153262	UP
208370_s_at	RCAN1	0.690736	0.000230386	0.0039968	UP
233328_x_at	SLC17A9	0.689992	0.000538004	0.00760684	UP
240777_at	SYNE2	0.689062	0.00443655	0.034888	UP
1559593_a_at	MED26	0.689059	9.32608e-06	0.000454096	UP
214011_s_at	NOP16	0.686785	0.000173652	0.00334298	UP
243840_at	CLSPN	0.68657	0.000759072	0.0098345	UP
210140_at	CST7	0.683437	0.0220691	0.110626	UP
206983_at	CCR6	0.683036	0.0018485	0.0186082	UP
223461_at	TBC1D7	0.682577	1.10391e-07	2.75216e-05	UP
1554602_at	RBM8A	0.682308	0.0016921	0.0176065	UP
205831_at	CD2	0.682206	0.000546059	0.00765509	UP
221649_s_at	PPAN	0.681231	2.11186e-05	0.000800564	UP
236910_at	MRPL39	0.680556	1.98219e-05	0.000759537	UP
232485_at	SNX29	0.677338	0.00020527	0.00364088	UP
212276_at	LPIN1	0.676574	7.31927e-08	2.14982e-05	UP
219017_at	ETNK1	0.675758	2.64769e-08	1.1461e-05	UP
211039_at	CHRNA1	0.673697	0.00643657	0.0461626	UP
221923_s_at	NPM1	0.672882	0.000183914	0.00339003	UP
236852_at	FBXO43	0.669797	0.00189997	0.018909	UP
225171_at	ARHGAP18	0.668392	5.04653e-05	0.00148128	UP
201830_s_at	NET1	0.667317	0.00101578	0.0119244	UP
217919_s_at	MRPL42	0.667239	6.90714e-06	0.000377888	UP
223490_s_at	EXOSC3	0.666543	1.04635e-05	0.000488327	UP
217853_at	TNS3	0.666192	0.000472866	0.00681495	UP
1553703_at	ZNF791	0.665145	2.66536e-07	4.41348e-05	UP
232234_at	SLA2	0.664391	0.000161259	0.00314373	UP
213517_at	PCBP2	0.664234	1.27184e-06	0.00011788	UP
208523_x_at	HIST1H2BI	0.664206	1.79753e-05	0.000718119	UP
210656_at	EED	0.663958	0.000194441	0.0035407	UP
222453_at	CYBRD1	0.663705	1.1414e-05	0.000520381	UP
231323_at	PSMB2	0.661583	7.48011e-05	0.00193896	UP
244828_x_at	NAF1	0.661554	6.43263e-05	0.00175234	UP
242918_at	NASP	0.660978	3.61314e-05	0.0011666	UP
235421_at	MAP3K8	0.660591	4.92866e-05	0.00146122	UP
203927_at	NFKBIE	0.660083	6.03321e-05	0.00167244	UP
203828_s_at	IL32	0.65973	0.00766285	0.0522817	UP
201088_at	KPNA2	0.659298	1.61887e-06	0.000139844	UP
223394_at	SERTAD1	0.659157	0.000901317	0.0110354	UP
211814_s_at	CCNE2	0.657723	0.000733872	0.00949005	UP
231438_x_at	CDH8	0.657395	0.00300548	0.0265401	UP
227290_at	CDYL2	0.653632	0.000429193	0.00623082	UP
228737_at	TOX2	0.653021	0.000138589	0.00203171	UP
208547_at	HIST1H2BB	0.652897	0.00995751	0.0625577	UP
212038_s_at	VDAC1	0.652897	5.3423e-06	0.000313619	UP
206245_s_at	IVNS1ABP	0.651897	1.14999e-06	0.000110278	UP
1564310_a_at	PARP15	0.650105	2.64718e-06	0.000192078	UP
212858_at	PAQR4	0.64786	0.00354272	0.0299846	UP
205174_s_at	QPCT	0.647088	0.000673825	0.00897362	UP
218550_s_at	LRRC20	0.646377	0.000493338	0.00712759	UP
207492_at	NGLY1	0.64622	0.00207464	0.0201546	UP
211995_x_at	ACTG1	0.645432	5.22996e-07	6.68875e-05	UP
240369_at	TTC7A	0.645323	5.9831e-06	0.000339597	UP
1552531_a_at	NLRP11	0.643134	0.000278286	0.00457755	UP
227038_at	SGMS2	0.642516	0.0142976	0.0811167	UP
1554572_a_at	SUV39H2	0.642513	0.000116893	0.00267394	UP
205945_at	IL6R	0.642138	0.000320884	0.00503365	UP
204638_at	ACP5	0.642007	2.89261e-06	0.000202921	UP
202872_at	ATP6V1C1	0.641981	7.67182e-09	5.7019e-06	UP
1557349_at	RERE	0.641714	0.00322997	0.0279464	UP
205414_s_at	ARHGAP44	0.641486	4.34165e-05	0.00133195	UP
228167_at	KLHL6	0.641483	8.67426e-06	0.00043241	UP
202309_at	MTHFD1	0.641227	2.81842e-06	0.00020076	UP
213302_at	PFAS	0.640755	2.16303e-05	0.000815348	UP
226287_at	CCDC34	0.640472	2.85456e-05	0.000991569	UP
201619_at	PRDX3	0.638979	4.98736e-05	0.00146944	UP
1553386_at	MFSD2A	0.63807	5.94964e-06	0.000338674	UP
218717_s_at	P3H2	0.637866	0.00468115	0.0364826	UP
228189_at	BAG4	0.63742	0.000214853	0.00377294	UP
218597_s_at	CISD1	0.6373	4.96594e-05	0.00146747	UP
206074_s_at	HMGA1	0.637205	0.000144239	0.00209604	UP
229574_at	TRA2A	0.637109	0.000903823	0.0110513	UP
1554020_at	BICD1	0.636924	2.7944e-07	4.5298e-05	UP
204531_s_at	BRCA1	0.636673	5.87192e-06	0.000335972	UP
219777_at	GIMAP6	0.635932	0.0127234	0.0747497	UP
202890_at	MAP7	0.634029	0.00685178	0.047785	UP
226118_at	CENPO	0.633587	0.000249612	0.00431905	UP
1554833_at	MCTP2	0.633202	5.5696e-07	6.89912e-05	UP
204923_at	SASH3	0.633033	0.000145866	0.00214854	UP
201487_at	CTSC	0.632881	1.18278e-06	0.000111989	UP
242648_at	KLHL8	0.631922	2.47439e-05	0.000897502	UP
214567_s_at	XCL1	0.631857	0.0239298	0.117811	UP
217523_at	CD44	0.631315	0.0060845	0.0440014	UP
235726_at	ZBTB10	0.63079	0.00172962	0.0179359	UP
209825_s_at	UCK2	0.6306	0.00312118	0.0274363	UP
219271_at	GALNT14	0.630312	0.000472226	0.00681495	UP
210038_at	PRKCQ	0.630105	0.00974308	0.061621	UP
209459_s_at	ABAT	0.630037	1.19322e-07	2.91321e-05	UP
200650_s_at	LDHA	0.629655	1.65272e-05	0.000674341	UP
241342_at	TMEM65	0.627995	2.13399e-06	0.000165784	UP
224009_x_at	DHRS9	0.627191	0.00831242	0.0547313	UP
221978_at	HLA-F	0.627044	1.12006e-06	0.000108735	UP
224677_x_at	C11orf31	0.626245	1.26259e-07	2.97812e-05	UP
213649_at	SRSF7	0.625917	6.7828e-06	0.000371601	UP
232065_x_at	CENPL	0.625521	9.1322e-06	0.000446311	UP
218750_at	TAF1D	0.624288	0.000148919	0.00295608	UP
204700_x_at	DIEXF	0.62412	1.12072e-06	0.000108735	UP
220358_at	BATF3	0.62373	0.00179254	0.0182862	UP
201714_at	TUBG1	0.622963	9.84831e-05	0.00237269	UP
238049_at	GRAMD3	0.622944	2.44709e-06	0.000182218	UP
223620_at	GPR34	0.622688	0.00194556	0.0193222	UP
207426_s_at	TNFSF4	0.621594	4.49949e-05	0.00137076	UP
209680_s_at	KIFC1	0.620786	0.0014251	0.0154514	UP
217957_at	CFAP20	0.620188	3.56497e-05	0.00115588	UP
225438_at	NUDCD1	0.617975	0.000106963	0.00251095	UP
205780_at	BIK	0.617864	0.000335573	0.00534141	UP
1569097_at	TP53BP1	0.617726	0.00544605	0.0409828	UP
237968_at	ATL2	0.616926	0.00219369	0.0212155	UP
202340_x_at	NR4A1	0.616395	0.00252712	0.0234613	UP
206951_at	HIST1H4E	0.616391	0.000758623	0.00983001	UP
202276_at	SHFM1	0.614178	2.7659e-05	0.000967598	UP
218454_at	PLBD1	0.613715	0.000382601	0.00596171	UP
215012_at	ZNF451	0.612866	0.000707788	0.00928964	UP
244413_at	CLECL1	0.612532	3.62695e-07	5.2142e-05	UP
1565752_at	FGD2	0.61215	0.000216796	0.00381752	UP
209541_at	IGF1	0.611233	0.00155872	0.0165069	UP
210159_s_at	TRIM31	0.611074	0.00341044	0.0291127	UP
1556608_a_at	EHD4	0.610652	0.000137526	0.00202143	UP
218595_s_at	HEATR1	0.610412	2.66662e-07	4.41348e-05	UP
231956_at	RNF213	0.609561	9.49418e-05	0.00230998	UP
217820_s_at	ENAH	0.608799	0.000354988	0.00551581	UP
34764_at	LARS2	0.608226	5.37287e-07	6.75582e-05	UP
229097_at	DIAPH3	0.60816	0.000159309	0.00310443	UP
211877_s_at	PCDHGA11	0.608136	0.0151308	0.0851802	UP
206733_at	TULP2	0.607832	0.00378808	0.0311418	UP
201341_at	ENC1	0.607183	0.0021541	0.0206917	UP
235969_at	SCN8A	0.607061	0.00910587	0.0590599	UP
202236_s_at	SLC16A1	0.606773	1.44524e-05	0.000616787	UP
212110_at	SLC39A14	0.606159	1.86778e-05	0.000730623	UP
218741_at	CENPM	0.60587	0.000306237	0.00485548	UP
223079_s_at	GLS	0.605817	0.000665611	0.00880178	UP
242832_at	PER1	0.605754	0.0179019	0.0953537	UP
243526_at	WDR86	0.60547	0.0126742	0.0743168	UP
219933_at	GLRX2	0.605318	4.92784e-05	0.00146122	UP
209981_at	CSDC2	0.605022	0.000914889	0.0111533	UP
206457_s_at	DIO1	0.604588	0.00529291	0.0397605	UP
209543_s_at	CD34	0.604077	0.000504915	0.00721485	UP
242477_at	TTC39B	0.603986	0.000263675	0.00440386	UP
201280_s_at	DAB2	0.603817	0.0145313	0.0825445	UP
204172_at	CPOX	0.60318	6.40107e-05	0.00174686	UP
210176_at	TLR1	0.603054	8.08195e-05	0.00206591	UP
213520_at	RECQL4	0.602576	0.00242231	0.0227699	UP
206991_s_at	CCR5	0.602027	0.0318782	0.142346	UP
204790_at	SMAD7	0.601627	0.0310018	0.140139	UP
221029_s_at	WNT5B	0.601159	0.00418479	0.0335735	UP
231984_at	MTAP	0.600699	8.45416e-07	9.18695e-05	UP
202740_at	ACY1	0.599989	6.26915e-06	0.000350465	UP
223413_s_at	LYAR	0.599387	0.000601897	0.00819129	UP
217589_at	RAB40A	0.599082	0.00101028	0.0118927	UP
239021_at	TLR6	0.59888	0.000101467	0.002413	UP
204260_at	CHGB	0.598869	0.00642037	0.0461343	UP
213095_x_at	AIF1	0.598469	0.00199878	0.019626	UP
214455_at	HIST1H2BC	0.598373	0.000229667	0.0039968	UP
1567358_at	NAV2	0.597549	0.0216535	0.108927	UP
225541_at	RPL22L1	0.597504	0.00048673	0.00704786	UP
229052_at	ANKRD23	0.595962	0.00474746	0.0367724	UP
237485_at	SRSF3	0.595904	0.00575077	0.0423942	UP
207308_at	SLCO1A2	0.595769	0.00174874	0.0180135	UP
1555843_at	HNRNPM	0.595208	9.89288e-05	0.00237705	UP
237863_at	TMPO	0.595045	0.00687732	0.0479014	UP
202421_at	IGSF3	0.594577	0.000240994	0.0041244	UP
235178_x_at	ESCO2	0.594336	0.0114462	0.0692555	UP
227354_at	PAG1	0.594165	0.000484814	0.00699483	UP
219304_s_at	PDGFD	0.592498	2.31654e-05	0.000856041	UP
202638_s_at	ICAM1	0.592022	1.00476e-06	0.000102165	UP
223640_at	HCST	0.591066	3.36832e-07	4.9324e-05	UP
1552919_at	C4orf36	0.590637	0.0154399	0.0859968	UP
211787_s_at	EIF4A1	0.59061	1.60519e-05	0.000660021	UP
207949_s_at	ICA1	0.590581	0.00350158	0.0296202	UP
222061_at	CD58	0.590418	1.65134e-07	3.50125e-05	UP
1559419_at	CACNB2	0.589938	0.000225744	0.00388262	UP
202270_at	GBP1	0.58918	0.0125697	0.0739503	UP
203712_at	PUM3	0.588923	1.19809e-07	2.91321e-05	UP
206126_at	CXCR5	0.588298	0.0014457	0.0157824	UP
223062_s_at	PSAT1	0.588293	0.0214281	0.108493	UP
220035_at	NUP210	0.58826	8.09925e-05	0.00206899	UP
228069_at	MTFR2	0.587975	0.00220638	0.0212643	UP
203915_at	CXCL9	0.587103	0.0115775	0.0698046	UP
202930_s_at	SUCLA2	0.586843	2.95106e-05	0.00101259	UP
204696_s_at	CDC25A	0.586798	0.00140878	0.0151898	UP
224654_at	DDX21	0.586376	1.95508e-06	0.000154644	UP
242260_at	MATR3	0.585113	0.00309755	0.0273533	UP
203206_at	FAM53B	-0.584989	5.98828e-05	0.0016635	DN
202172_at	VEZF1	-0.585862	6.31264e-05	0.00173162	DN
209182_s_at	C10orf10	-0.586282	0.0034807	0.0293668	DN
200685_at	SRSF11	-0.589251	9.677e-05	0.00234	DN
209153_s_at	TCF3	-0.589682	3.99122e-08	1.48319e-05	DN
217645_at	SYNJ2BP-COX16	-0.590382	1.33553e-06	0.00012206	DN
223836_at	FGFBP2	-0.592064	0.00619588	0.0445665	DN
241962_at	NT5DC1	-0.592172	6.28235e-05	0.00172692	DN
238890_at	BRWD1	-0.592891	3.643e-05	0.00116939	DN
236019_at	RAB12	-0.593686	0.000525717	0.00746012	DN
1556097_at	HOMER2	-0.595743	0.00220419	0.0212418	DN
203430_at	HEBP2	-0.596574	1.34527e-05	0.000590764	DN
201590_x_at	ANXA2	-0.596576	3.42382e-07	4.97667e-05	DN
205898_at	CX3CR1	-0.596807	0.0337693	0.148986	DN
225197_at	C16orf72	-0.597024	2.13215e-09	2.99955e-06	DN
1553878_at	GOT1L1	-0.597322	0.00484566	0.0374282	DN
228905_at	PCM1	-0.597484	3.51454e-06	0.000233853	DN
200931_s_at	VCL	-0.597511	1.08571e-06	0.000107066	DN
207326_at	BTC	-0.597634	0.00419091	0.0336178	DN
226408_at	TEAD2	-0.598754	1.42744e-07	3.23151e-05	DN
200810_s_at	CIRBP	-0.599297	1.54953e-06	0.000135338	DN
221704_s_at	VPS37B	-0.599395	0.000110556	0.0025678	DN
238587_at	UBASH3B	-0.599494	0.000232199	0.00400526	DN
217728_at	S100A6	-0.5995	3.69812e-08	1.4143e-05	DN
235850_at	FAM162A	-0.600437	9.30829e-07	9.7258e-05	DN
221868_at	PAIP2B	-0.60089	3.30977e-05	0.00110114	DN
222032_s_at	USP7	-0.600896	3.27377e-06	0.000221576	DN
241403_at	CLK4	-0.601013	2.13801e-06	0.000165784	DN
213746_s_at	FLNA	-0.601867	0.000233459	0.00405505	DN
234133_s_at	TMEM116	-0.601921	0.000579428	0.00791834	DN
203142_s_at	AP3B1	-0.603	2.72682e-05	0.000955624	DN
1563559_at	FMN1	-0.604717	0.0166482	0.0914447	DN
216082_at	NEU3	-0.605909	0.000436648	0.00625008	DN
231406_at	ORAI2	-0.606545	6.01036e-07	7.28343e-05	DN
238472_at	FBXO9	-0.606856	3.03936e-07	4.71352e-05	DN
204141_at	TUBB2A	-0.607333	0.00166685	0.0171611	DN
217762_s_at	RAB31	-0.608278	1.56587e-05	0.000648593	DN
226599_at	FHDC1	-0.610841	5.5575e-06	0.000321935	DN
1559399_s_at	ZCCHC10	-0.611159	4.22465e-05	0.00130828	DN
203633_at	CPT1A	-0.612607	0.000382108	0.00596171	DN
1556711_at	FAM216B	-0.613824	0.03654	0.15686	DN
208683_at	CAPN2	-0.614753	2.43379e-06	0.000181571	DN
203146_s_at	GABBR1	-0.617474	0.000162639	0.00317117	DN
212921_at	SMYD2	-0.617498	0.000223779	0.00383582	DN
223500_at	CPLX1	-0.617513	0.00143273	0.0156063	DN
204805_s_at	H1FX	-0.617976	5.09063e-05	0.00148897	DN
212179_at	PNISR	-0.619082	5.49026e-05	0.00156829	DN
200950_at	ARPC1A	-0.62007	2.82799e-05	0.000984076	DN
233014_at	IDI1	-0.623617	4.08423e-07	5.60462e-05	DN
235170_at	ZNF92	-0.62363	7.04049e-05	0.00185588	DN
219589_s_at	TMEM143	-0.624367	0.000627899	0.00837774	DN
239848_at	EIF3M	-0.624499	4.33265e-08	1.59502e-05	DN
1556874_a_at	MEX3C	-0.626359	0.0069561	0.0485978	DN
200885_at	RHOC	-0.626753	4.33361e-05	0.00133195	DN
228762_at	LFNG	-0.627325	3.54473e-05	0.00115302	DN
208206_s_at	RASGRP2	-0.627678	0.000757595	0.00978898	DN
229391_s_at	FAM26F	-0.628876	2.04231e-05	0.000778033	DN
1569986_x_at	TNNT3	-0.629213	0.00258942	0.0237973	DN
209598_at	PNMA2	-0.629215	0.00301416	0.0265617	DN
221264_s_at	TARDBP	-0.629777	0.00016484	0.00318883	DN
238868_at	UACA	-0.629929	0.00367181	0.0306831	DN
244354_at	STRN	-0.630205	2.95477e-06	0.000204914	DN
228788_at	YPEL1	-0.631437	8.24407e-06	0.000420483	DN
227732_at	ATXN7L1	-0.631525	1.41525e-05	0.000607278	DN
239300_at	PIK3C3	-0.635805	8.57714e-07	9.26583e-05	DN
229537_at	LMO4	-0.635823	0.000241822	0.00414226	DN
201034_at	ADD3	-0.635862	3.44583e-08	1.33198e-05	DN
225704_at	FBRSL1	-0.636462	2.67331e-06	0.000193219	DN
204055_s_at	CTAGE5	-0.637352	4.70345e-05	0.00141972	DN
200916_at	TAGLN2	-0.637565	7.08443e-06	0.00038347	DN
230224_at	ZCCHC18	-0.639272	0.000110506	0.0025678	DN
201853_s_at	CDC25B	-0.640186	3.01331e-05	0.00102502	DN
237387_at	ARPC5	-0.640909	5.23863e-05	0.00151843	DN
238043_at	ARID1B	-0.641947	1.03816e-06	0.000104056	DN
228088_at	SESTD1	-0.642559	7.48197e-05	0.00193896	DN
214891_at	FBXO21	-0.643118	0.00190923	0.0191164	DN
204223_at	PRELP	-0.643682	0.00414787	0.0333643	DN
242344_at	GABRB2	-0.644244	0.000402673	0.00606374	DN
213364_s_at	SNX1	-0.64602	3.95948e-06	0.000254434	DN
213309_at	PLCL2	-0.646063	1.44441e-10	8.12811e-07	DN
228346_at	ZNF844	-0.646971	7.24239e-06	0.000387616	DN
203542_s_at	KLF9	-0.647481	1.61821e-05	0.000664681	DN
230904_at	FSD1L	-0.647593	3.05932e-05	0.0010362	DN
212094_at	PEG10	-0.647791	4.80234e-05	0.00143375	DN
202709_at	FMOD	-0.648917	9.49143e-06	0.000459809	DN
1562089_at	GLYATL1	-0.651101	1.90079e-05	0.00073992	DN
232077_s_at	YPEL3	-0.652462	0.000372482	0.00577108	DN
235699_at	REM2	-0.655409	3.65797e-05	0.00117243	DN
217729_s_at	AES	-0.657712	6.01386e-08	1.91042e-05	DN
232395_x_at	AGBL3	-0.657848	0.00218612	0.0211804	DN
203785_s_at	DDX28	-0.661669	1.84833e-06	0.000150056	DN
237245_at	BUB3	-0.665179	2.41618e-06	0.000180599	DN
1559413_at	TCP11L2	-0.666911	0.00201914	0.0197981	DN
201161_s_at	YBX3	-0.667214	5.77089e-06	0.000331372	DN
1563792_at	AMN	-0.670111	7.31749e-08	2.14982e-05	DN
228630_at	ZNF84	-0.670883	3.71665e-05	0.00118353	DN
229707_at	ZNF606	-0.670954	1.15217e-06	0.000110278	DN
203596_s_at	IFIT5	-0.672333	6.51605e-06	0.000361004	DN
210770_s_at	CACNA1A	-0.675004	7.04358e-05	0.00185588	DN
202455_at	HDAC5	-0.675911	4.29511e-05	0.00132282	DN
217733_s_at	TMSB10	-0.67895	5.51534e-08	1.84667e-05	DN
218029_at	FAM65A	-0.679375	0.000107073	0.00251204	DN
232049_at	SNX2	-0.680269	0.000537296	0.00754683	DN
218872_at	TESC	-0.68268	7.10702e-06	0.000383497	DN
240432_x_at	KLF7	-0.683162	5.26137e-05	0.00152337	DN
230385_at	MARCH3	-0.684302	0.000411715	0.00613507	DN
202833_s_at	SERPINA1	-0.684821	0.00220104	0.0212418	DN
212377_s_at	NOTCH2	-0.68534	2.94126e-08	1.22468e-05	DN
225637_at	DEF8	-0.686762	0.000276041	0.00456714	DN
242988_at	DCST2	-0.689609	0.000205162	0.00364088	DN
201367_s_at	ZFP36L2	-0.690852	0.00206779	0.0200436	DN
230015_at	PRCD	-0.691337	0.00048459	0.00698639	DN
221727_at	SUB1	-0.694039	1.50571e-06	0.000133284	DN
1553117_a_at	STK38	-0.695448	1.52227e-06	0.000134125	DN
229806_at	QRICH1	-0.697229	0.00191811	0.019136	DN
228256_s_at	EPB41L4A	-0.697894	4.18387e-06	0.000261459	DN
226810_at	OGFRL1	-0.699532	2.10949e-08	9.89225e-06	DN
202254_at	SIPA1L1	-0.700614	7.25972e-06	0.000388016	DN
202456_s_at	ZER1	-0.700823	2.51315e-05	0.000903244	DN
205495_s_at	GNLY	-0.701002	0.00726405	0.0501818	DN
221867_at	N4BP1	-0.701147	1.84873e-05	0.000728249	DN
226530_at	BMF	-0.702808	3.21477e-06	0.00021871	DN
228532_at	C1orf162	-0.703798	3.26257e-05	0.00108965	DN
221556_at	CDC14B	-0.704441	1.07177e-08	6.94793e-06	DN
233000_x_at	DPH3P1	-0.712792	0.000440273	0.00633722	DN
209068_at	HNRNPDL	-0.714501	1.44129e-09	2.46843e-06	DN
238909_at	S100A10	-0.715178	0.000964067	0.0115763	DN
1555745_a_at	LYZ	-0.71787	0.00930847	0.0596771	DN
219961_s_at	KIZ	-0.720719	1.8421e-11	2.78018e-07	DN
1555977_at	MYL12A	-0.721235	7.46599e-05	0.00193865	DN
1557502_at	PCCB	-0.721575	0.000539567	0.00762083	DN
222520_s_at	IFT57	-0.723479	2.62918e-06	0.000191789	DN
230300_at	PSMA5	-0.724967	6.35199e-08	1.95477e-05	DN
202888_s_at	ANPEP	-0.725744	0.00135325	0.0146082	DN
1558248_at	GOLM1	-0.725813	0.000228839	0.00390594	DN
228358_at	SOX12	-0.728534	1.23048e-07	2.95548e-05	DN
213758_at	COX4I1	-0.729488	8.26076e-05	0.00209114	DN
225886_at	DDX5	-0.731783	2.57378e-08	1.1447e-05	DN
228480_at	VAPA	-0.732796	1.21228e-05	0.000545125	DN
208438_s_at	FGR	-0.733029	1.96175e-05	0.000753905	DN
234725_s_at	SEMA4B	-0.734535	9.06313e-07	9.59118e-05	DN
205081_at	CRIP1	-0.736662	3.09094e-05	0.00104332	DN
201885_s_at	CYB5R3	-0.740522	9.37713e-10	1.84687e-06	DN
225509_at	SAP30L	-0.74149	1.04919e-08	6.94793e-06	DN
208978_at	CRIP2	-0.742754	0.00936347	0.0598704	DN
210036_s_at	KCNH2	-0.743026	7.00531e-07	8.04508e-05	DN
216356_x_at	BAIAP3	-0.744171	4.28557e-05	0.00132259	DN
1556321_a_at	MESDC1	-0.745892	1.13546e-05	0.000518272	DN
229686_at	P2RY8	-0.749668	4.37513e-06	0.000270127	DN
226005_at	UBE2G1	-0.751937	2.41005e-10	9.49343e-07	DN
236288_at	RNF34	-0.75229	6.50809e-07	7.65254e-05	DN
242388_x_at	TAGAP	-0.753325	0.000718699	0.00940924	DN
235611_at	SREK1	-0.754629	0.00127905	0.0141537	DN
225390_s_at	KLF13	-0.761026	8.29221e-08	2.25384e-05	DN
227945_at	TBC1D1	-0.76158	4.9641e-10	1.30556e-06	DN
1552337_s_at	HOXD4	-0.767276	0.00109844	0.0127306	DN
208387_s_at	MMP24	-0.770009	0.00043895	0.00627478	DN
238981_at	TMEM223	-0.772245	0.00169595	0.0176182	DN
206834_at	HBD	-0.778188	0.00117927	0.0133206	DN
207106_s_at	LTK	-0.782561	6.86459e-07	7.92971e-05	DN
242389_at	LUC7L3	-0.783913	4.27838e-06	0.000265401	DN
243753_at	ERICH3	-0.786966	0.000100551	0.00239613	DN
202364_at	MXI1	-0.788929	1.7426e-07	3.65121e-05	DN
203378_at	PCF11	-0.796952	2.25121e-09	3.05784e-06	DN
220936_s_at	H2AFJ	-0.797029	3.89658e-07	5.48179e-05	DN
1559975_at	BTG1	-0.8024	0.00233409	0.0220131	DN
227189_at	CPNE5	-0.814485	7.97285e-09	5.71137e-06	DN
222996_s_at	CXXC5	-0.818231	6.06737e-10	1.31459e-06	DN
220987_s_at	NUAK2	-0.819978	8.46605e-07	9.18695e-05	DN
219371_s_at	KLF2	-0.82768	0.000333021	0.00527615	DN
233019_at	CNOT7	-0.839349	1.83561e-05	0.000725969	DN
230305_at	DNAJC15	-0.850415	1.31405e-06	0.000120376	DN
210240_s_at	CDKN2D	-0.857676	2.90182e-11	2.85764e-07	DN
229844_at	FOXP1	-0.86089	1.28156e-06	0.000118502	DN
214146_s_at	PPBP	-0.867438	0.00128517	0.014192	DN
205019_s_at	VIPR1	-0.868004	4.98755e-05	0.00146944	DN
200999_s_at	CKAP4	-0.872945	2.75551e-07	4.51551e-05	DN
211986_at	AHNAK	-0.877869	1.86731e-06	0.000150728	DN
208051_s_at	PAIP1	-0.884751	5.30296e-10	1.30556e-06	DN
221253_s_at	TXNDC5	-0.886442	8.95096e-06	0.000442949	DN
237187_at	HRK	-0.893747	0.000178715	0.00336841	DN
240642_at	ZMYM2	-0.901365	2.78729e-05	0.00097249	DN
203729_at	EMP3	-0.902008	2.19226e-06	0.000167977	DN
204848_x_at	HBG1	-0.902864	0.000170997	0.00331198	DN
215001_s_at	GLUL	-0.920411	0.000241205	0.0041244	DN
223569_at	PLPP5	-0.921739	3.41256e-05	0.00112583	DN
219301_s_at	CNTNAP2	-0.92619	5.09163e-05	0.00148897	DN
228835_at	TMEM59	-0.9415	6.07438e-09	5.09098e-06	DN
203795_s_at	BCL7A	-0.943757	5.53069e-05	0.00157527	DN
222572_at	PDP1	-0.952451	1.96257e-09	2.86324e-06	DN
203865_s_at	ADARB1	-0.952962	0.000109166	0.00254447	DN
215423_at	MARCH6	-0.972024	9.04448e-06	0.000445339	DN
221234_s_at	BACH2	-0.989375	1.12368e-06	0.000108754	DN
228157_at	ZNF207	-1.02196	1.60045e-06	0.000138862	DN
211998_at	H3F3B	-1.05126	6.64593e-05	0.00178664	DN
219014_at	PLAC8	-1.07365	0.000300585	0.00483903	DN
225133_at	KLF3	-1.09009	3.42801e-06	0.000230431	DN
204419_x_at	HBG2	-1.0901	4.66761e-05	0.00141106	DN
224797_at	ARRDC3	-1.0943	0.00048265	0.0069566	DN
228284_at	TLE1	-1.13148	2.35081e-06	0.000176719	DN
229552_at	LOC283454	-1.14272	0.000108473	0.00253432	DN
202917_s_at	S100A8	-1.14621	0.0390753	0.165008	DN
228377_at	KLHL14	-1.15148	1.85459e-05	0.000729083	DN
222557_at	STMN3	-1.16579	6.23389e-08	1.93354e-05	DN
218486_at	KLF11	-1.19361	6.09132e-07	7.31534e-05	DN
230499_at	BIRC3	-1.19566	1.10216e-07	2.75216e-05	DN
227448_at	ARGLU1	-1.20761	7.58008e-09	5.7019e-06	DN
225207_at	PDK4	-1.22989	8.22884e-08	2.25384e-05	DN
201009_s_at	TXNIP	-1.38164	1.36302e-08	7.88128e-06	DN
211696_x_at	HBB	-3.04448	1.25105e-06	0.000116227	DN
204018_x_at	HBA2	-3.25677	3.16699e-07	4.77973e-05	DN
1Average paired fold change LN - PB on a log2 scale
